# Supplementary material for: Association of Maternal Cigarette Smoking and Smoking Cessation With Preterm Birth
Source: PubMed Central journal article supplement (PMC6481448; doi:10.1001/jamanetworkopen.2019.2514), 2019-04-19
Supplement: jamanetwopen-2-e192514-s001.pdf [file jamanetwopen-2-e192514-s001.pdf]

## Supplementary Online Content

Soneji S, Beltrán-Sánchez H. Association of maternal cigarette smoking and smoking cessation with preterm birth. *JAMA Netw Open*. 2019;2(4):e192514. doi:10.1001/jamanetworkopen.2019.2514

**eTable 1.** Number of Births

**eTable 2.** Missing Data by Covariate

**eTable 3.** Description of Sample of Births Occurring in States That Adopted 2003 Revision of US Live Birth Certificate

**eTable 4.** Univariable Regression Results for Smoking Cessation at Various Points in Pregnancy and Premature Birth

**eFigure.** Prevalence of Current Cigarette Smoking Among Females Aged 18-44 Years, Every Day Smoking Among Current Cigarette Smokers, and Quit Attempt Within Past Year Among Female Current Cigarette Smokers

This supplementary material has been provided by the authors to give readers additional information about their work.

**eTable 1.** Number of Births

| Year of Delivery | Total Births | States That Adopted 2003 Revision of U.S. Live Birth Certificate | Births Occurring in States that Did Not Adopt 2003 Revision of U.S. Live Birth Certificate | Births Occurring in States that Adopted 2003 Revision of U.S. Live Birth Certificate |                                                           |                                                            |
|------------------|--------------|------------------------------------------------------------------|--------------------------------------------------------------------------------------------|--------------------------------------------------------------------------------------|-----------------------------------------------------------|------------------------------------------------------------|
|                  |              |                                                                  |                                                                                            | Total                                                                                | Missing Cigarette Smoking Frequency on Birth Certificates | Reported Cigarette Smoking Frequency on Birth Certificates |
| 2011             | 3,953,590    | 36 & DC <sup>16</sup>                                            | 561,726 (14.2%)                                                                            | 3,391,864 (85.8%)                                                                    | 262,720 (7.7%)                                            | 3,129,144 (92.3%)                                          |
| 2012             | 3,952,841    | 38 & DC <sup>45</sup>                                            | 464,054 (11.7%)                                                                            | 3,488,787 (88.3%)                                                                    | 176,892 (5.1%)                                            | 3,311,895 (94.9%)                                          |
| 2013             | 3,932,181    | 41 & DC <sup>46</sup>                                            | 375,149 (9.5%)                                                                             | 3,557,032 (90.5%)                                                                    | 171,111 (4.8%)                                            | 3,385,921 (95.2%)                                          |
| 2014             | 3,988,076    | 47 & DC <sup>47</sup>                                            | 142,788 (3.6%)                                                                             | 3,845,288 (96.4%)                                                                    | 75,122 (2.0%)                                             | 3,770,166 (98.0%)                                          |
| 2015             | 3,978,497    | 48 & DC <sup>48</sup>                                            | 69,013 (1.7%)                                                                              | 3,909,484 (98.3%)                                                                    | 36,218 (0.9%)                                             | 3,873,266 (99.1%)                                          |
| 2016             | 3,945,875    | 50 & DC <sup>17</sup>                                            | 0 (0.0%)                                                                                   | 3,945,875 (100.0%)                                                                   | 19,244 (0.5%)                                             | 3,926,631 (99.5%)                                          |
| 2017             | 3,855,500    | 50 & DC <sup>49</sup>                                            | 0 (0.0%)                                                                                   | 3,855,500 (100.0%)                                                                   | 19,020 (0.5%)                                             | 3,836,480 (99.5%)                                          |
| Total            | 27,606,560   | —                                                                | 1,612,730 (5.8%)                                                                           | 25,993,830 (94.2%)                                                                   | 760,327 (2.9%)                                            | 25,233,503 (97.1%)                                         |

Source: 2011-2017 U.S. Live Birth Certificate data and Births: Final Data for 2011-2017.<sup>16,17,45-49</sup>

**eTable 2.** Missing Data by Covariate

| <b>Covariate</b>                                   | <b>Proportion Missing</b> |
|----------------------------------------------------|---------------------------|
| Age at Delivery                                    | 0.0%                      |
| Race/Ethnicity                                     | 0.0%                      |
| Educational Attainment                             | 1.2%                      |
| Marital Status                                     | 1.8%                      |
| Receipt of WIC Benefits                            | 1.9%                      |
| Source of Payment                                  | 1.0%                      |
| Gravidity                                          | 0.0%                      |
| Para                                               | 0.0%                      |
| Abortus                                            | 0.0%                      |
| Plurality                                          | 0.0%                      |
| Smoking Frequency, Three Months Prior to Pregnancy | 2.9%                      |
| Smoking Frequency, 1st Trimester                   | 2.9%                      |
| Smoking Frequency, 2nd Trimester                   | 3.0%                      |
| Smoking Frequency, 3rd Trimester                   | 3.0%                      |

**eTable 3.** Description of Sample of Births Occurring in States that Adopted 2003 Revision of U.S. Live Birth Certificate

| Characteristic                 | Total      | Trimester-Specific Smoking Frequency on Birth Certificate |                    |
|--------------------------------|------------|-----------------------------------------------------------|--------------------|
|                                |            | Missing                                                   | Recorded           |
| <b>Age at Delivery (Yrs)</b>   |            |                                                           |                    |
| <15                            | 18,791     | 722 (3.8%)                                                | 18,069 (96.2%)     |
| 15-19                          | 1,672,406  | 60,028 (3.6%)                                             | 1,612,378 (96.4%)  |
| 20-24                          | 5,676,443  | 186,964 (3.3%)                                            | 5,489,479 (96.7%)  |
| 25-29                          | 7,494,945  | 218,753 (2.9%)                                            | 7,276,192 (97.1%)  |
| 30-34                          | 6,990,497  | 188,073 (2.7%)                                            | 6,802,424 (97.3%)  |
| 35-39                          | 3,353,939  | 84,793 (2.5%)                                             | 3,269,146 (97.5%)  |
| 40-44                          | 730,922    | 19,557 (2.7%)                                             | 711,365 (97.3%)    |
| 45-49                          | 51,142     | 1,337 (2.6%)                                              | 49,805 (97.4%)     |
| 50-54                          | 4,745      | 100 (2.1%)                                                | 4,645 (97.9%)      |
| <b>Race/Ethnicity</b>          |            |                                                           |                    |
| Non-Hispanic White             | 13,786,690 | 428,545 (3.1%)                                            | 13,358,145 (96.9%) |
| Hispanic                       | 6,055,416  | 90,052 (1.5%)                                             | 5,965,364 (98.5%)  |
| Non-Hispanic Black             | 3,749,407  | 174,993 (4.7%)                                            | 3,574,414 (95.3%)  |
| Non-Hispanic Other             | 2,189,216  | 50,885 (2.3%)                                             | 2,138,331 (97.7%)  |
| Unknown                        | 213,101    | 15,852 (7.4%)                                             | 197,249 (92.6%)    |
| <b>Educational Attainment</b>  |            |                                                           |                    |
| Less Than High School          | 3,930,623  | 119,586 (3.0%)                                            | 3,811,037 (97.0%)  |
| High School Graduate           | 6,454,117  | 210,311 (3.3%)                                            | 6,243,806 (96.7%)  |
| At Least Some College          | 15,289,329 | 404,960 (2.6%)                                            | 14,884,369 (97.4%) |
| <b>Marital Status</b>          |            |                                                           |                    |
| Unmarried                      | 10,289,199 | 343,859 (3.3%)                                            | 9,945,340 (96.7%)  |
| Married                        | 15,233,025 | 413,885 (2.7%)                                            | 14,819,140 (97.3%) |
| <b>Receipt of WIC Benefits</b> |            |                                                           |                    |
| No                             | 14,527,895 | 330,328 (2.3%)                                            | 14,197,567 (97.7%) |
| Yes                            | 10,961,653 | 313,389 (2.9%)                                            | 10,648,264 (97.1%) |
| <b>Source of Payment</b>       |            |                                                           |                    |
| Private                        | 12,388,915 | 339,891 (2.7%)                                            | 12,049,024 (97.3%) |

|                                   |            |                |                    |
|-----------------------------------|------------|----------------|--------------------|
| Medicaid                          | 11,148,261 | 333,942 (3.0%) | 10,814,319 (97.0%) |
| Other                             | 1,135,677  | 37,817 (3.3%)  | 1,097,860 (96.7%)  |
| Self-Pay                          | 1,057,429  | 25,108 (2.4%)  | 1,032,321 (97.6%)  |
| <b>Gravidity</b>                  |            |                |                    |
| 1                                 | 8,281,936  | 239,658 (2.9%) | 8,042,278 (97.1%)  |
| 2                                 | 7,294,997  | 200,408 (2.7%) | 7,094,589 (97.3%)  |
| 3                                 | 4,743,885  | 127,460 (2.7%) | 4,616,425 (97.3%)  |
| ≥4                                | 5,673,012  | 192,801 (3.4%) | 5,480,211 (96.6%)  |
| <b>Para</b>                       |            |                |                    |
| 1                                 | 10,082,409 | 288,495 (2.9%) | 9,793,914 (97.1%)  |
| 2                                 | 8,245,060  | 229,195 (2.8%) | 8,015,865 (97.2%)  |
| 3                                 | 4,360,675  | 124,630 (2.9%) | 4,236,045 (97.1%)  |
| ≥4                                | 3,305,686  | 118,007 (3.6%) | 3,187,679 (96.4%)  |
| <b>Abortus</b>                    |            |                |                    |
| 0                                 | 19,349,258 | 578,357 (3.0%) | 18,770,901 (97.0%) |
| 1                                 | 4,340,141  | 102,450 (2.4%) | 4,237,691 (97.6%)  |
| 2                                 | 1,437,801  | 35,691 (2.5%)  | 1,402,110 (97.5%)  |
| 3                                 | 489,652    | 13,055 (2.7%)  | 476,597 (97.3%)    |
| ≥4                                | 376,978    | 30,774 (8.2%)  | 346,204 (91.8%)    |
| <b>Plurality of Current Birth</b> |            |                |                    |
| 1                                 | 25,098,043 | 732,011 (2.9%) | 24,366,032 (97.1%) |
| 2                                 | 866,243    | 27,323 (3.2%)  | 838,920 (96.8%)    |
| ≥3                                | 29,544     | 993 (3.4%)     | 28,551 (96.6%)     |

Note: Yrs=Years.

Source: 2011-2017 U.S. Live Birth Certificate data.

**eTable 4.** Univariable Regression Results for Smoking Cessation at Various Points in Pregnancy and Premature Birth

|                                  | Cessation Throughout Pregnancy<br>(N=2,542,018) | Cessation After 1 <sup>st</sup> Trimester<br>(N=2,538,338) | Cessation After 2 <sup>nd</sup> Trimester<br>(N=1,596,099) | Cessation in 3 <sup>rd</sup> Trimester<br>(N=2,538,338) | Premature Birth Among Pre-Pregnancy Smokers<br>(N=2,537,393) | Premature Birth Among Pre-Pregnancy & Pregnancy Non-Smokers<br>(N=21,344,623) |
|----------------------------------|-------------------------------------------------|------------------------------------------------------------|------------------------------------------------------------|---------------------------------------------------------|--------------------------------------------------------------|-------------------------------------------------------------------------------|
| Covariate                        | OR (95% CI)                                     | OR (95% CI)                                                | OR (95% CI)                                                | OR (95% CI)                                             | OR (95% CI)                                                  | OR (95% CI)                                                                   |
| Year of Delivery (Ref: 2011)     |                                                 |                                                            |                                                            |                                                         |                                                              |                                                                               |
| 2012                             | 1.01 (1.00, 1.03)                               | 0.99 (0.98, 1.01)                                          | 1.01 (0.99, 1.04)                                          | 1.01 (1.00, 1.02)                                       | 1.00 (0.98, 1.01)                                            | 0.98 (0.98, 0.99)                                                             |
| 2013                             | 1.01 (1.00, 1.02)                               | 0.97 (0.96, 0.99)                                          | 1.01 (0.98, 1.03)                                          | 1.00 (0.99, 1.01)                                       | 1.01 (1.00, 1.02)                                            | 0.97 (0.97, 0.98)                                                             |
| 2014                             | 0.99 (0.98, 1.00)                               | 1.00 (0.99, 1.02)                                          | 1.01 (0.99, 1.04)                                          | 1.00 (0.99, 1.01)                                       | 1.03 (1.02, 1.05)                                            | 0.97 (0.97, 0.98)                                                             |
| 2015                             | 1.02 (1.01, 1.04)                               | 1.02 (1.01, 1.04)                                          | 1.02 (0.99, 1.04)                                          | 1.03 (1.02, 1.04)                                       | 1.04 (1.03, 1.06)                                            | 0.97 (0.96, 0.97)                                                             |
| 2016                             | 1.04 (1.03, 1.05)                               | 1.02 (1.01, 1.04)                                          | 1.03 (1.00, 1.05)                                          | 1.04 (1.03, 1.05)                                       | 1.08 (1.07, 1.10)                                            | 0.98 (0.97, 0.98)                                                             |
| 2017                             | 1.01 (1.00, 1.02)                               | 0.99 (0.98, 1.01)                                          | 1.03 (1.00, 1.05)                                          | 1.01 (1.00, 1.02)                                       | 1.14 (1.12, 1.15)                                            | 1.00 (0.99, 1.00)                                                             |
| Age at Delivery (Ref: 25-29 Yrs) |                                                 |                                                            |                                                            |                                                         |                                                              |                                                                               |
| <15                              | 1.09 (0.91, 1.32)                               | 2.26 (1.82, 2.80)                                          | 2.28 (1.64, 3.17)                                          | 1.74 (1.48, 2.05)                                       | 1.31 (1.06, 1.63)                                            | 2.34 (2.25, 2.42)                                                             |
| 15-19                            | 1.10 (1.09, 1.11)                               | 1.51 (1.49, 1.53)                                          | 1.48 (1.44, 1.51)                                          | 1.32 (1.31, 1.34)                                       | 0.89 (0.88, 0.90)                                            | 1.36 (1.36, 1.37)                                                             |
| 20-24                            | 1.01 (1.00, 1.01)                               | 1.17 (1.15, 1.18)                                          | 1.20 (1.18, 1.22)                                          | 1.09 (1.09, 1.10)                                       | 0.90 (0.89, 0.90)                                            | 1.12 (1.11, 1.12)                                                             |
| 30-34                            | 1.10 (1.09, 1.11)                               | 0.98 (0.97, 0.99)                                          | 0.95 (0.93, 0.96)                                          | 1.05 (1.04, 1.05)                                       | 1.17 (1.16, 1.19)                                            | 1.04 (1.03, 1.04)                                                             |
| 35-39                            | 1.04 (1.03, 1.05)                               | 0.96 (0.94, 0.97)                                          | 0.94 (0.91, 0.96)                                          | 1.00 (0.99, 1.01)                                       | 1.44 (1.43, 1.46)                                            | 1.26 (1.26, 1.27)                                                             |
| 40-44                            | 0.88 (0.86, 0.91)                               | 0.88 (0.84, 0.91)                                          | 0.93 (0.88, 0.99)                                          | 0.87 (0.86, 0.89)                                       | 1.69 (1.65, 1.74)                                            | 1.64 (1.62, 1.65)                                                             |
| 45-49                            | 0.82 (0.72, 0.94)                               | 0.85 (0.71, 1.02)                                          | 0.81 (0.61, 1.08)                                          | 0.81 (0.73, 0.91)                                       | 1.91 (1.68, 2.16)                                            | 2.82 (2.76, 2.88)                                                             |

|                                                     |                   |                   |                   |                   |                   |                   |
|-----------------------------------------------------|-------------------|-------------------|-------------------|-------------------|-------------------|-------------------|
| 50-54                                               | 0.38 (0.17, 0.82) | 0.59 (0.24, 1.48) | 0.28 (0.04, 2.00) | 0.39 (0.22, 0.72) | 1.87 (1.05, 3.33) | 4.58 (4.31, 4.87) |
| Race/Ethnicity (Ref: Non-Hispanic White)            |                   |                   |                   |                   |                   |                   |
| Hispanic                                            | 2.19 (2.16, 2.21) | 2.06 (2.03, 2.09) | 1.67 (1.63, 1.71) | 2.37 (2.35, 2.39) | 1.06 (1.05, 1.08) | 1.19 (1.18, 1.19) |
| Non-Hispanic Black                                  | 1.14 (1.13, 1.15) | 1.33 (1.31, 1.35) | 1.38 (1.36, 1.41) | 1.27 (1.26, 1.28) | 1.67 (1.65, 1.69) | 1.80 (1.79, 1.81) |
| Non-Hispanic Other                                  | 1.27 (1.25, 1.29) | 1.42 (1.40, 1.45) | 1.39 (1.35, 1.43) | 1.40 (1.38, 1.41) | 1.14 (1.12, 1.16) | 1.06 (1.06, 1.07) |
| Unknown                                             | 1.03 (0.99, 1.08) | 0.97 (0.91, 1.04) | 1.02 (0.92, 1.13) | 1.02 (0.98, 1.06) | 1.40 (1.33, 1.47) | 1.27 (1.26, 1.29) |
| Educational Attainment (Ref: Less than High School) |                   |                   |                   |                   |                   |                   |
| High School Graduate                                | 1.63 (1.62, 1.65) | 1.48 (1.46, 1.49) | 1.27 (1.25, 1.29) | 1.58 (1.57, 1.60) | 0.83 (0.82, 0.83) | 0.91 (0.91, 0.92) |
| At Least Some College                               | 3.07 (3.05, 3.10) | 2.28 (2.26, 2.31) | 1.63 (1.61, 1.66) | 2.89 (2.86, 2.91) | 0.77 (0.76, 0.77) | 0.75 (0.74, 0.75) |
| Marital Status (Ref: Unmarried)                     | 1.67 (1.66, 1.68) | 1.09 (1.08, 1.10) | 0.92 (0.91, 0.93) | 1.41 (1.40, 1.42) | 0.87 (0.86, 0.88) | 0.73 (0.73, 0.73) |
| WIC Benefits (Ref: No)                              | 0.57 (0.57, 0.58) | 0.76 (0.76, 0.77) | 0.88 (0.87, 0.89) | 0.63 (0.62, 0.63) | 0.91 (0.90, 0.92) | 1.17 (1.17, 1.18) |
| Source of Payment (Ref: Private Insurance)          |                   |                   |                   |                   |                   |                   |
| Medicaid                                            | 0.37 (0.37, 0.37) | 0.50 (0.50, 0.51) | 0.72 (0.71, 0.73) | 0.39 (0.39, 0.39) | 1.30 (1.29, 1.31) | 1.29 (1.28, 1.29) |
| Other                                               | 0.65 (0.64, 0.66) | 0.77 (0.75, 0.78) | 0.96 (0.93, 1.00) | 0.68 (0.67, 0.69) | 1.19 (1.17, 1.21) | 1.12 (1.11, 1.12) |
| Self-Pay                                            | 0.36 (0.35, 0.37) | 0.43 (0.41, 0.44) | 0.67 (0.64, 0.70) | 0.36 (0.35, 0.37) | 1.85 (1.81, 1.89) | 1.01 (1.00, 1.02) |
| Gravida (Ref: 1)                                    |                   |                   |                   |                   |                   |                   |
| 2                                                   | 0.69 (0.68, 0.69) | 0.64 (0.63, 0.64) | 0.72 (0.70, 0.73) | 0.63 (0.62, 0.63) | 1.12 (1.11, 1.13) | 0.99 (0.99, 1.00) |
| 3                                                   | 0.53 (0.52, 0.53) | 0.51 (0.50, 0.51) | 0.61 (0.60, 0.62) | 0.48 (0.47, 0.48) | 1.29 (1.27, 1.30) | 1.10 (1.10, 1.11) |
| 4                                                   | 0.36 (0.36, 0.37) | 0.39 (0.38, 0.39) | 0.54 (0.53, 0.55) | 0.34 (0.34, 0.35) | 1.75 (1.73, 1.76) | 1.39 (1.39, 1.40) |
| Para (Ref: 1)                                       |                   |                   |                   |                   |                   |                   |

|                                                                                            |                   |                   |                   |                   |                         |                         |
|--------------------------------------------------------------------------------------------|-------------------|-------------------|-------------------|-------------------|-------------------------|-------------------------|
| 2                                                                                          | 0.61 (0.61, 0.62) | 0.57 (0.57, 0.58) | 0.66 (0.65, 0.67) | 0.56 (0.55, 0.56) | 1.12 (1.11, 1.13)       | 0.97 (0.97, 0.97)       |
| 3                                                                                          | 0.44 (0.44, 0.44) | 0.44 (0.43, 0.44) | 0.56 (0.55, 0.57) | 0.40 (0.40, 0.41) | 1.37 (1.36, 1.38)       | 1.13 (1.12, 1.13)       |
| 4                                                                                          | 0.30 (0.30, 0.30) | 0.33 (0.32, 0.33) | 0.48 (0.47, 0.49) | 0.29 (0.28, 0.29) | 1.93 (1.91, 1.95)       | 1.43 (1.43, 1.44)       |
| Abortus (Ref: 0)                                                                           |                   |                   |                   |                   |                         |                         |
| 1                                                                                          | 0.86 (0.86, 0.87) | 0.90 (0.89, 0.90) | 0.96 (0.95, 0.98) | 0.87 (0.87, 0.88) | 1.09 (1.08, 1.10)       | 1.08 (1.08, 1.08)       |
| 2                                                                                          | 0.76 (0.75, 0.77) | 0.82 (0.80, 0.83) | 0.92 (0.90, 0.94) | 0.77 (0.77, 0.78) | 1.23 (1.21, 1.24)       | 1.24 (1.24, 1.25)       |
| 3                                                                                          | 0.67 (0.66, 0.68) | 0.76 (0.74, 0.77) | 0.87 (0.84, 0.90) | 0.69 (0.68, 0.70) | 1.34 (1.31, 1.36)       | 1.41 (1.39, 1.42)       |
| 4                                                                                          | 0.58 (0.57, 0.59) | 0.67 (0.65, 0.69) | 0.86 (0.83, 0.90) | 0.61 (0.60, 0.62) | 1.39 (1.36, 1.42)       | 1.54 (1.53, 1.56)       |
| Plurality (Ref: 1)                                                                         |                   |                   |                   |                   |                         |                         |
| 2                                                                                          | —                 | —                 | —                 | —                 | 10.73 (10.57, 10.89)    | 12.52 (12.46, 12.58)    |
| ≥3                                                                                         | —                 | —                 | —                 | —                 | 139.61 (110.53, 176.33) | 146.85 (139.74, 154.33) |
| Cigarette Smoking Frequency, Three Months Prior to Pregnancy (Ref: 1-9 Cigarettes per Day) |                   |                   |                   |                   |                         |                         |
| 10-19                                                                                      | 0.46 (0.46, 0.46) | 0.66 (0.66, 0.67) | 0.84 (0.82, 0.85) | 0.50 (0.50, 0.51) | 1.00 (0.99, 1.01)       | —                       |
| ≥20                                                                                        | 0.28 (0.28, 0.28) | 0.47 (0.46, 0.47) | 0.81 (0.79, 0.82) | 0.33 (0.33, 0.34) | 1.04 (1.03, 1.05)       | —                       |
| Cigarette Smoking Frequency, 1 <sup>st</sup> Trimester (Ref: 1-9 Cigarettes per Day)       |                   |                   |                   |                   |                         |                         |
| 10-19                                                                                      | —                 | 0.37 (0.37, 0.38) | 0.57 (0.57, 0.58) | —                 | —                       | —                       |
| ≥20                                                                                        | —                 | 0.32 (0.32, 0.33) | 0.49 (0.49, 0.50) | —                 | —                       | —                       |
| Cigarette Smoking Frequency, 2 <sup>nd</sup> Trimester (Ref: 1-9 Cigarettes per Day)       |                   |                   |                   |                   |                         |                         |
| 10-19                                                                                      | —                 | —                 | 0.31 (0.30, 0.31) | —                 | —                       | —                       |
| ≥20                                                                                        | —                 | —                 | 0.30 (0.30, 0.31) | —                 | —                       | —                       |
| Cigarette Smoking Frequency, 1 <sup>st</sup> Trimester (Ref: 0 Cigarettes per Day)         |                   |                   |                   |                   |                         |                         |



|                                                                                    |   |   |   |                      |                   |   |
|------------------------------------------------------------------------------------|---|---|---|----------------------|-------------------|---|
| 1-9                                                                                | — | — | — | 0.02 (0.02,<br>0.02) | 1.37 (1.36, 1.38) | — |
| 10-19                                                                              | — | — | — | 0.01 (0.01,<br>0.01) | 1.41 (1.40, 1.42) | — |
| ≥20                                                                                | — | — | — | 0.01 (0.01,<br>0.01) | 1.54 (1.53, 1.56) | — |
| Cigarette Smoking Frequency, 2 <sup>nd</sup> Trimester (Ref: 0 Cigarettes per Day) |   |   |   |                      |                   |   |
| 1-9                                                                                | — | — | — | 0.00 (0.00,<br>0.00) | 1.35 (1.34, 1.36) | — |
| 10-19                                                                              | — | — | — | 0.00 (0.00,<br>0.00) | 1.38 (1.37, 1.39) | — |
| ≥20                                                                                | — | — | — | 0.00 (0.00,<br>0.00) | 1.56 (1.54, 1.58) | — |
| Cigarette Smoking Frequency, 3 <sup>rd</sup> Trimester (Ref: 0 Cigarettes per Day) |   |   |   |                      |                   |   |
| 1-9                                                                                | — | — | — | —                    | 1.22 (1.21, 1.23) | — |
| 10-19                                                                              | — | — | — | —                    | 1.27 (1.26, 1.28) | — |
| ≥20                                                                                | — | — | — | —                    | 1.43 (1.41, 1.45) | — |

Source: Authors' analysis of 2011-2017 U.S. Live Birth Certificate data.

**eFigure.** Prevalence of Current Cigarette Smoking Among Females Aged 18-44 Years, Every Day Smoking Among Current Cigarette Smokers, and Quit Attempt Within Past Year Among Female Current Cigarette Smokers

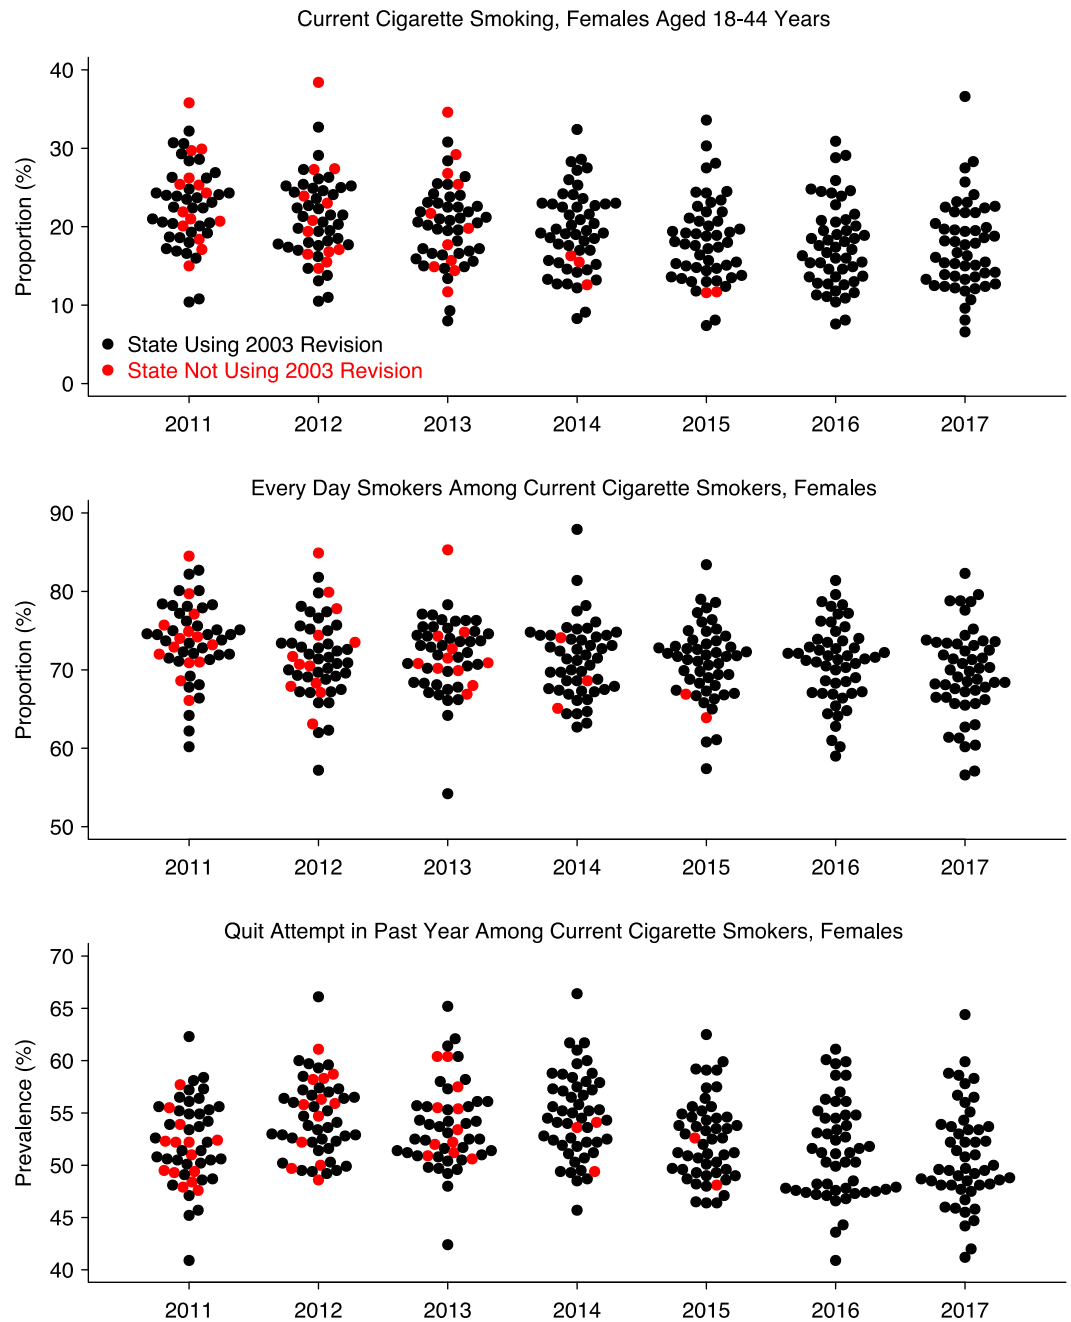

Source: Centers for Disease Control and Prevention, State Tobacco Activities Tracking and Evaluation (STATE) System. Based on 2011-2017 Behavioral Risk Factor Surveillance System data.
